# Supplementary material
Source: PubMed Central journal article supplement (PMC1765436)
Supplement: pnas_0605688104_2.pdf [file pnas_0605688104_2.pdf]

Figure 2

| Gene                | I      | 6    | 9A   | 10          | 11         | 14     | 21           | 31     | 39           | 50          | 51            | 52            | 54     | 55            | 59         | 62     |             |        |              |               |              |           |                |                  |                 | 62/63           | 64      |                |                |         |         |          |          |               |         |         |              |           |           |   |
|---------------------|--------|------|------|-------------|------------|--------|--------------|--------|--------------|-------------|---------------|---------------|--------|---------------|------------|--------|-------------|--------|--------------|---------------|--------------|-----------|----------------|------------------|-----------------|-----------------|---------|----------------|----------------|---------|---------|----------|----------|---------------|---------|---------|--------------|-----------|-----------|---|
| Nucleotide position | 560NCR | Q703 | 763P | SS745(945)P | W1090(91)R | 12694T | V12779(207)A | 14089I | OCH19431 AMB | T31732(325) | I56595 (530)V | N71252 (207)T | 87280C | S87306 (193)G | A87815( )T | 89734T | 90535 (15)V | 94167L | P97748(585)T | C97796 (601)R | L101089(44)P | 105169NCR | L105310(1275)S | L105331 (1268)JQ | I105356 (1260)V | V105544 (1197)A | 105705A | L105724(1137)P | R106262 (958)G | 106710A | 107136A | S107252C | V107599A | L107797(446)P | 108030A | 108111P | M108838(99)T | 109137NCR | I09200NCR |   |
| Oka Parent          | T      | T    | A    | T           | C          | T      | T            | C      | A            | T           | A             | T             | A      | A             | T          | T      | A           | T      | A            | G             | A            | A         | C              | T                | A               | T               | A       | T              | A              | T       | A       | T        | A        | A             | T       | T       | A            | A         | A         | A |
| Oka vaccine         | C      | Y    | Y    | R           |            |        | Y            |        | R            | Y           | Y             | R             | Y      | R             | Y          | Y      |             | R      | R            | R             | R            | R         | A              | Y                | R               | Y               | R       | R              | C              | A       | Y       | C        | A        | R             | T       | C       | A            | R         | A         | A |

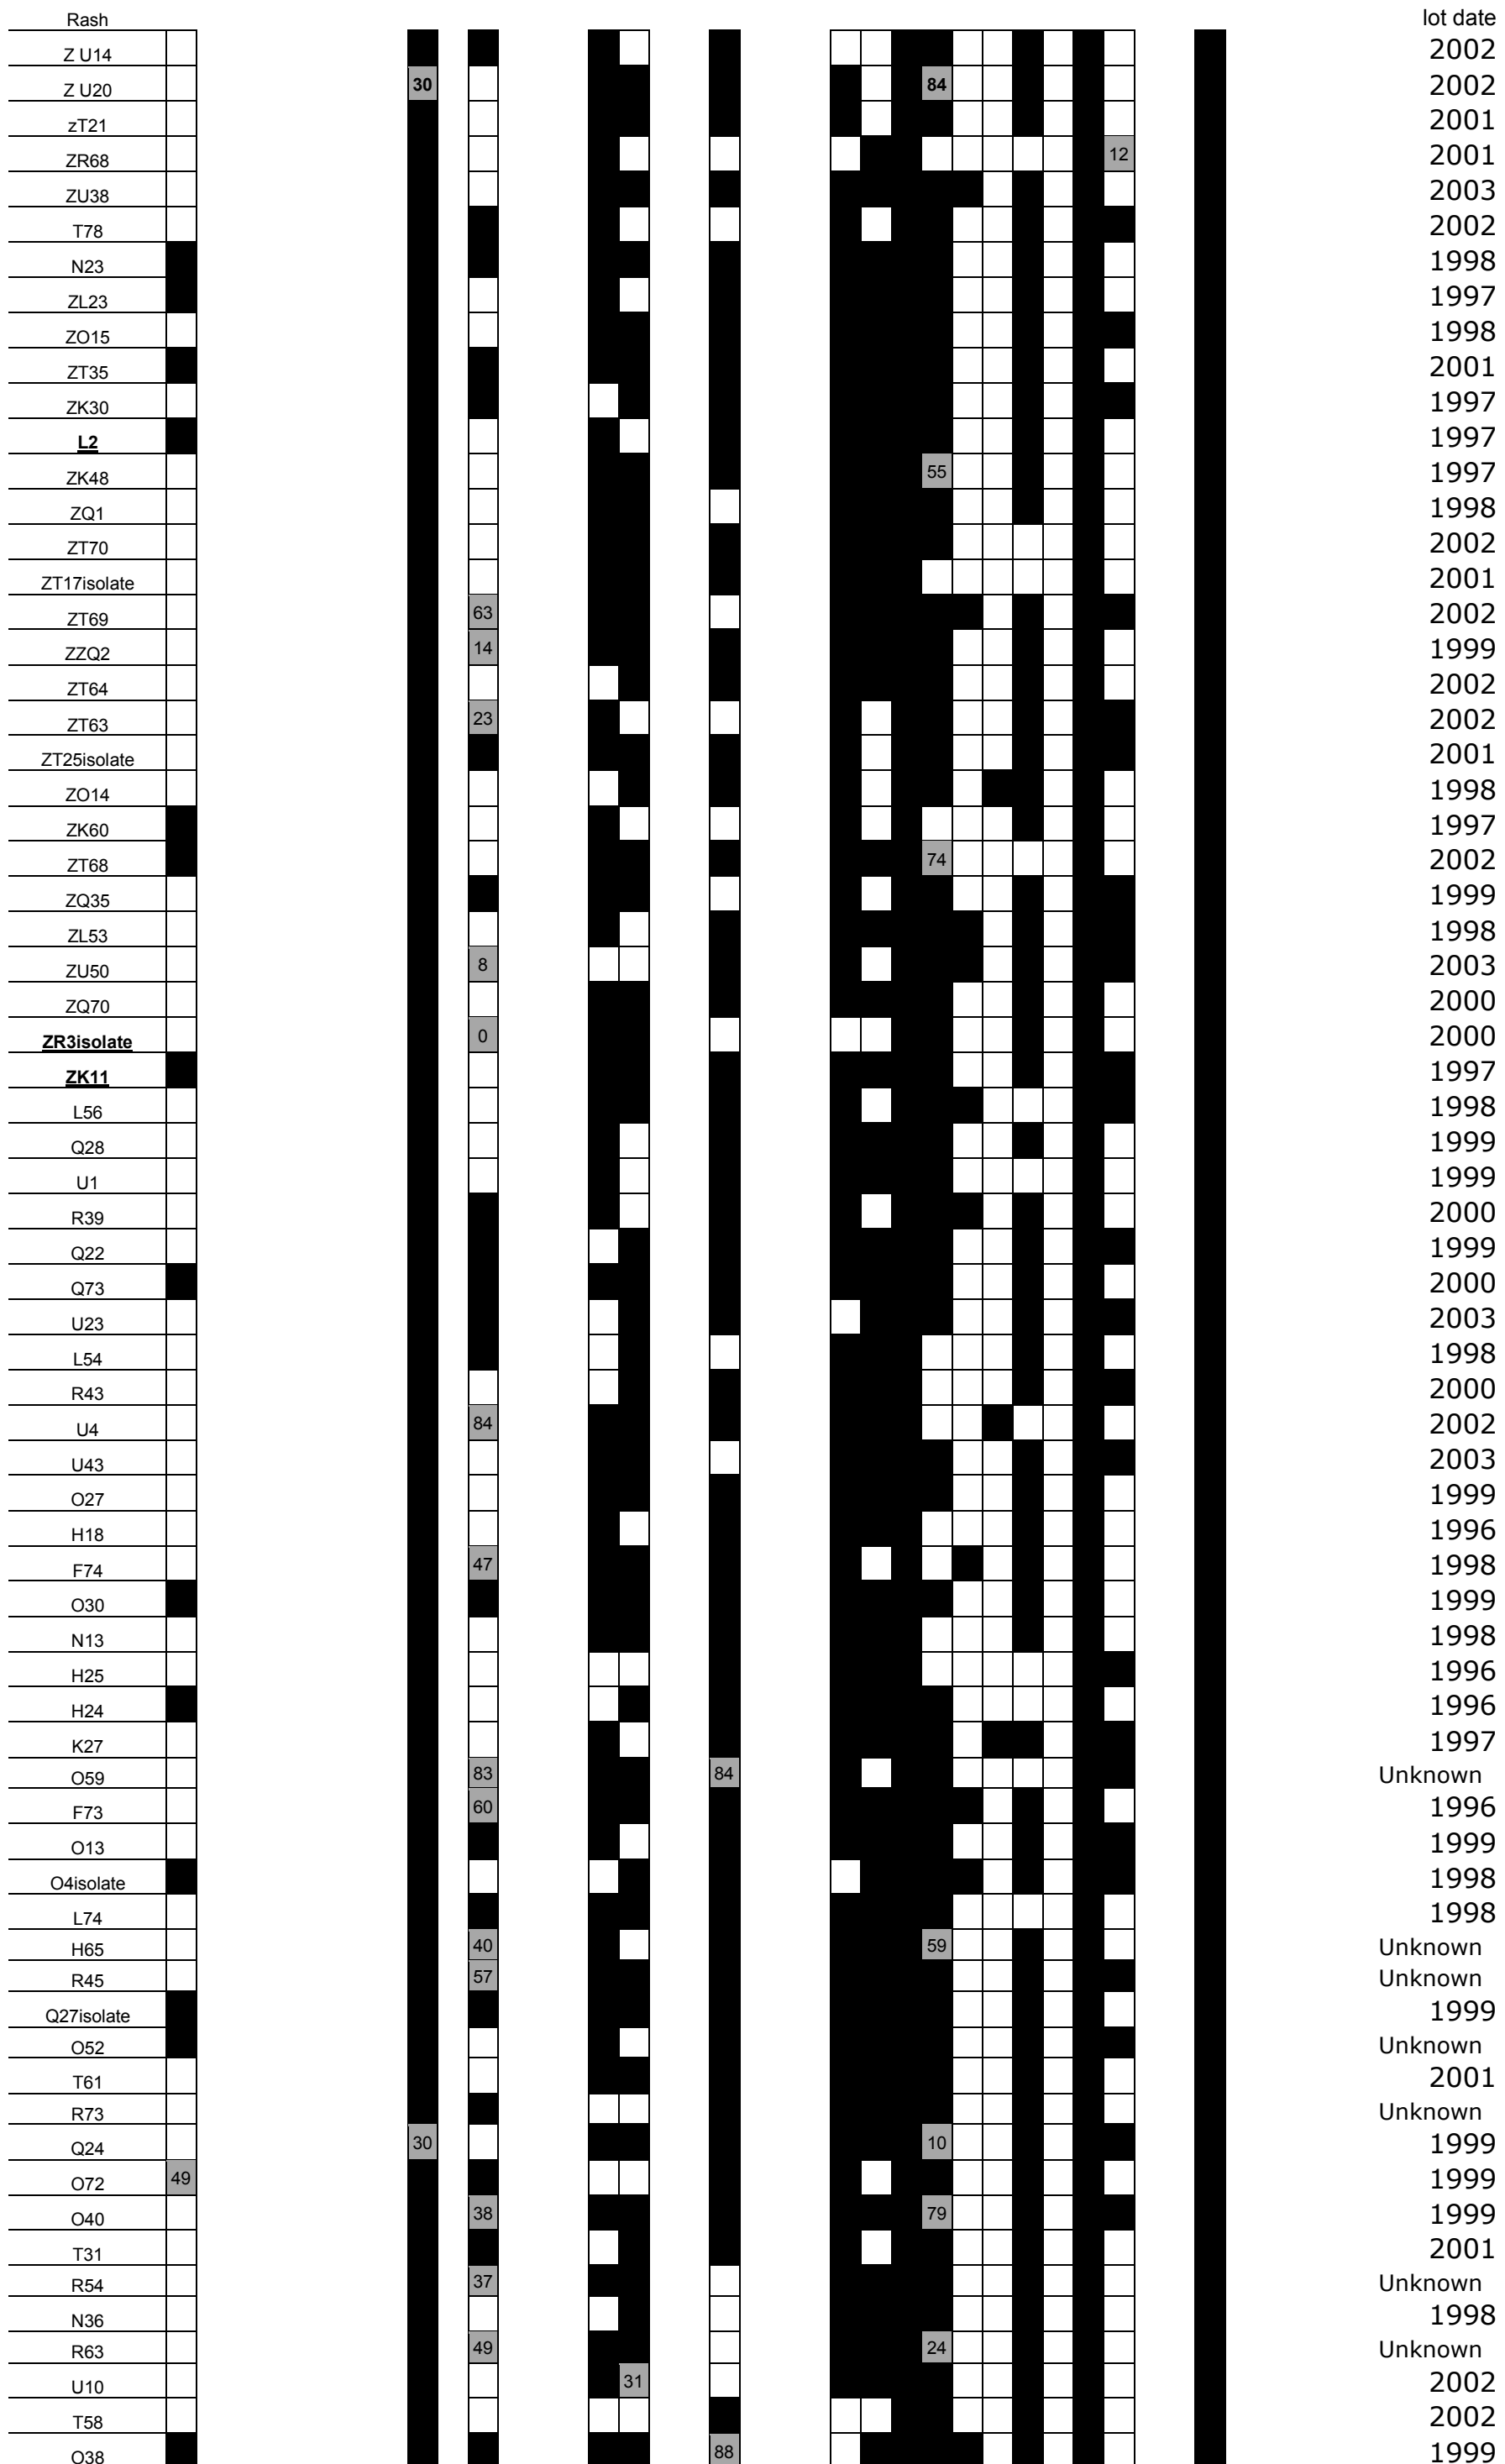

Vaccine lot date  
 2002  
 2002  
 2001  
 2001  
 2003  
 2002  
 1998  
 1997  
 1998  
 2001  
 1997  
 1997  
 1998  
 2002  
 2001  
 2002  
 1999  
 2002  
 2002  
 2001  
 1998  
 1997  
 2002  
 1999  
 1998  
 2003  
 2000  
 2000  
 1997  
 1998  
 1999  
 1999  
 2000  
 1999  
 2000  
 2003  
 1998  
 2000  
 2002  
 2003  
 1999  
 1996  
 1998  
 1999  
 1998  
 1996  
 1996  
 1997  
 Unknown  
 1996  
 1999  
 1998  
 1998  
 Unknown  
 Unknown  
 1999  
 Unknown  
 2001  
 Unknown  
 1999  
 1999  
 1999  
 2001  
 Unknown  
 1998  
 Unknown  
 2002  
 2002  
 1999
