# Supplementary material
Source: PubMed Central journal article supplement (PMC1765436)
Supplement: pnas_0605688104_4.pdf [file pnas_0605688104_4.pdf]

**Table 2. Primers used for amplification of vaccine-associated SNPs for CSA**

| Primer name* | Position (5'-3') | Product size | Sequence (5'-3')         | Annealing temperature (°C) |
|--------------|------------------|--------------|--------------------------|----------------------------|
| VZV-(1) F    | 427-450          | 506          | TCAGCTGGCTCTTCTAAGAATTCG | 56                         |
| VZV-(1) F    | 932-911          |              | TATTTTGGGATCCGCAATGTC    |                            |
| VZV-(6) F    | 5537-5554        | 446          | ATGAGCTGAAATAACACC       | 37                         |
| VZV-(6) R    | 5982-5965        |              | TTCTCCAAAGTAACAACC       |                            |
| VZV-(9) F    | 10622-10639      | 431          | TATTTACTGCCGTTTCCA       | 37                         |
| VZV-(9) R    | 11052-11035      |              | ACTGCATTAGAGCGACAA       |                            |
| VZV-(10) F   | 12664-12681      | 362          | GAAAGAGCATAACAAAA        | 35                         |
| VZV-(10) R   | 13025-12308      |              | TTCCCTTCTAATAACACA       |                            |
| VZV-(11) F   | 13796-13813      | 674          | CGCATCGGATGATTTTCC       | 60                         |
| VZV-(11) R   | 14469-14450      |              | TACATTCCGCCATAGCAAAC     |                            |
| VZV-(14) F   | 19319-19336      | 320          | CCCCTAAAAAATGGAAAT       | 37                         |
| VZV-(14) R   | 19638-19621      |              | GGAACTCGACGGACCTAT       |                            |
| VZV-(21) F   | 31430-31447      | 386          | TAGCTCACTCACTCCTCT       | 37                         |
| VZV-(21) R   | 31816-31799      |              | TCTGCTACATTACTTCCA       |                            |
| VZV-(31) F   | 58257-58274      | 405          | ATTCACCACAAAAACACC       | 35                         |
| VZV-(31) R   | 58661-58644      |              | AAATTAAAGGACGGCTAT       |                            |
| VZV-(39) F   | 71038-71055      | 370          | CTACCCTTATCTACATCC       | 31                         |
| VZV-(39) R   | 71407-71390      |              | TACCCAACATTATTTTA        |                            |
| VZV-(50) F   | 87219-87236      | 399          | CGCTCTGCTGTCGTAAT        | 42                         |
| VZV-(50) R   | 87617-87600      |              | CCGGAATAGAGGTGGAT        |                            |
| VZV-(51) F   | 89505-89519      | 526          | TTAATACCGAAGAACAAA       | 33                         |
| VZV-(51) R   | 90027-90010      |              | AAACGAAATAGAGCAATG       |                            |
| VZV-(52) F   | 90455-90472      | 424          | AAAGGCCTCTAACCAATG       | 37                         |
| VZV-(52) R   | 90878-90861      |              | ACTGGCGAATAAAAACGAT      |                            |

Table 2. Continued.

| Primer name   | Position (5'-3') | Product size | Sequence (5'-3')       | Annealing temperature (°C) |
|---------------|------------------|--------------|------------------------|----------------------------|
| VZV-(54) F    | 93964-93981      | 414          | TCGTCATCTTCTGTAGG      | 35                         |
| VZV-(54) R    | 94377-94360      |              | TGCCAATAGTTTTCAATC     |                            |
| VZV-(55) F    | 97550-97567      | 335          | CGTGACGACTCCTTTGTG     | 44                         |
| VZV-(55) R    | 97884-97867      |              | GGGTCTTCGGGTATGGAG     |                            |
| VZV-(59/60) F | 10098-101015     | 451          | CGAAGAGACGGGGTGAA      | 46                         |
| VZV-(59/60) R | 101448-101431    |              | GAGGCGCTATCGGGAATC     |                            |
| VZV-(62)a F   | 105139-105160    | 484          | CTTTTATTAACAACAACAGTC  | 39                         |
| VZV-(62)a R   | 105622-105605    |              | GCATTCCCAGAGTAATGT     |                            |
| VZV-(62)b F   | 105603-105620    | 500          | CCACATTACTCTGGGAAT     | 40                         |
| VZV-(62)b R   | 106102-106085    |              | GTATCGAGACTGCGTTTG     |                            |
| VZV-(62)c F   | 106095-106112    | 511          | CTCGATACGAGCAAAACT     | 39                         |
| VZV-(62)c R   | 106605-106587    |              | GAGGCTTCTGATCATCTAC    |                            |
| VZV-(62)d F   | 106584-106602    | 465          | ATCGTAGATGATCAGAAGC    | 41                         |
| VZV-(62)d R   | 107048-107030    |              | GACAAGATTAGGGAGACAC    |                            |
| VZV-(62)e F   | 107030-107048    | 520          | GTGTCCTCCCTAAATCTTGTG  | 43                         |
| VZV-(62)e R   | 107549-107528    |              | CTGATTAACCTGATCTACTGTG |                            |
| VZV-(62)f F   | 107444-107462    | 562          | ACAGCTTTTGGTAGAACTG    | 41                         |
| VZV-(62)f R   | 108005-107987    |              | GTGGGAAGTGAAACTACAG    |                            |
| VZV-(62)g F   | 107983-108001    | 535          | CTGCCCTGTAGTTTCACTTC   | 41                         |
| VZV-(62)g R   | 108517-108499    |              | ACAGACAAACTCAGTCCAT    |                            |
| VZV-(62)h F   | 108369-108388    | 515          | GACCTTAACCTTCAAAGTCT   | 42                         |
| VZV-(62)h R   | 108883-108864    |              | AGCTAACACAAGACGACTAC   |                            |
| VZV-(62/63) F | 108860-108881    | 564          | ATACGTAGTCGTCTTGTGTTAG | 41                         |
| VZV-(62/63) R | 109423-109405    |              | GTAAGGTATGCGGAAATAG    |                            |
| VZV-(63/64) F | 111241-111258    | 534          | AACACCCCGTCCCCAAAG     | 46                         |
| VZV-(63/64) R | 111774-111757    |              | TGCCCTCCCCCACAAACT     |                            |

\*Numbers in parentheses refer to the ORF in which the primers anneal.
