# Supplementary material
Source: PubMed Central journal article supplement (PMC1765436)
Supplement: pnas_0605688104_5.pdf [file pnas_0605688104_5.pdf]

**Table 3. Primers used for amplification of vaccine-associated SNPs for pyrosequencing**

| Primer name       | Position (5'-3') | Product size | Sequence (5'-3')           | Annealing temperature (°C) |
|-------------------|------------------|--------------|----------------------------|----------------------------|
| 560 F             | 504-521          | 117          | CTGTCGTGGTCGCCATTG         | 55.1                       |
| 560 R (Biotin)    | 603-620          |              | 7ATACACGGCGGACAAAGGT       |                            |
| 560 Seq           | 542-559          |              | CCTCCCAACTCAACTACA         |                            |
| 19431 F           | 19409-19426      | 143          | GACCGCTTGGTTGGTTT          | 52.3                       |
| 19431 R (Biotin)  | 19530-19551      |              | 7TGCACTACTACCTACGCCACTACA  |                            |
| 19431 Seq         | 19413-19428      |              | CGTTTGGTTGGTTTCT           |                            |
| 89734 F (Biotin)  | 89710-89730      | 55           | 7AACTACCGCCCCAAATTAAC      | 59.7                       |
| 89734 R           | 89746-89764      |              | ATAGGCACAACGGCGAAAC        |                            |
| 89734 Seq         | 89738-89752      |              | GCGAAACAGCTCCCA            |                            |
| 97748 F           | 97718-97743      | 60           | ACCTTGGAGTTATTGTCTGGAACAAA | 62                         |
| 97748 R (Biotin)  | 97758-97777      |              | 7CCCATTAACCGCTGCTTCGT      |                            |
| 97748 Seq         | 97730-97746      |              | TTGTCTGGAACAACAAA          |                            |
| 105169 F (Biotin) | 105131-105151    | 174          | 7CCGTTCCGCTTTTATTAACAA     | 52                         |
| 105169 R          | 105281-105300    |              | GGTCAAGGTGGAGCTGTTGT       |                            |
| 105169 Seq        | 105171-105184    |              | TTCTCGTGAGCGCCA            |                            |
| 105356 F          | 105280-105300    | 103          | GACAACAGCTCCACCTTGACC      | 61                         |
| 105356 R (Biotin) | 105365-105382    |              | 7CACCGGGTCACTCCTTG         |                            |
| 105356 Seq        | 105340-105354    |              | GGGCCACCGACACG             |                            |
| 107136 F          | 107065-107083    | 116          | TCGACTGGCTGGGACTTGC        | 52                         |
| 107136 R (Biotin) | 107015-107132    |              | 7ACCCCGGCCACACAGACT        |                            |
| 107136 Seq        | 107115-107132    |              | TGGACACACAGAAAGAGA         |                            |
| 107797 F (Biotin) | 107778-107795    | 50           | 7CGGGTTCTGGATCGCGG         | 59.7                       |
| 107797 R          | 107806-107827    |              | NNNCGGGGCCACAGACAGAAATC    |                            |
| 107797 Seq        | 107798-107815    |              | GACAGAAATCATTTTCCC         |                            |
